# Supplementary material for: Iron Oxide Nanoparticles with Supramolecular Ureido-Pyrimidinone Coating for Antimicrobial Peptide Delivery
Source: MDPI journal article supplement (doi:10.3390/ijms241914649), 2023-09-27
Supplement: s1 [file s1]

# Iron Oxide Nanoparticles with Supramolecular Ureido-Pyrimidinone Coating for Antimicrobial Peptide Delivery

Chiara Turrina <sup>1</sup>, Jennifer Cookman <sup>2</sup>, Riccardo Bellan <sup>3</sup>, Jiankang Song <sup>3</sup>, Margret Paar <sup>4</sup>, Patricia Y. W. Dankers <sup>3</sup>, Sonja Berensmeier <sup>1</sup> and Sebastian P. Schwaminger <sup>1,4,5,\*</sup>

<sup>1</sup> Chair of Bioseparation Engineering, School of Engineering and Design, Technical University of Munich, Boltzmannstr. 15, 85748 Garching, Germany; c.turrina@tum.de (C.T.)

<sup>2</sup> Department of Chemical Sciences, Bernal Institute, University of Limerick, V94 T9PX Castletroy, Ireland; jennifer.cookman@ul.ie

<sup>3</sup> Department of Biomedical Engineering, Institute for Complex Molecular Systems, Eindhoven University of Technology, 5600 MB Eindhoven, The Netherlands; r.bellan@tue.nl (R.B.)

<sup>4</sup> Division of Medicinal Chemistry, Otto Loewi Research Center, Medical University of Graz, Neue Stiftingtalstraße 6, 8010 Graz, Austria

<sup>5</sup> BioTechMed-Graz, Mozartgasse 12, 8010 Graz, Austria

\* Correspondence: sebastian.schwaminger@medunigraz.at; Tel.: +43-3163-8572-125

## Supporting information

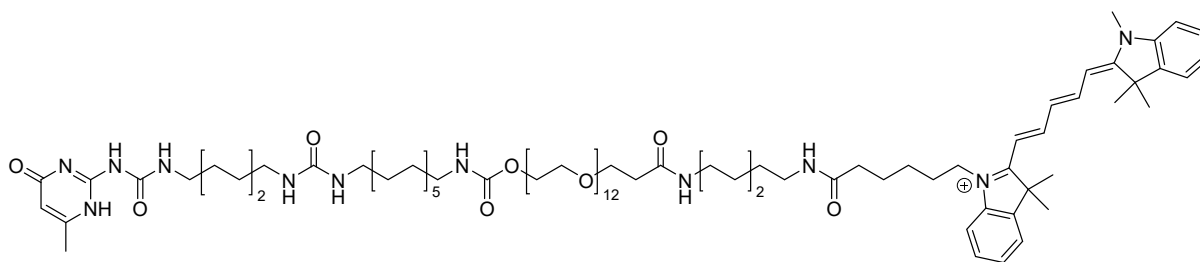

**Figure S1:** Structure of UPy-Cy5.

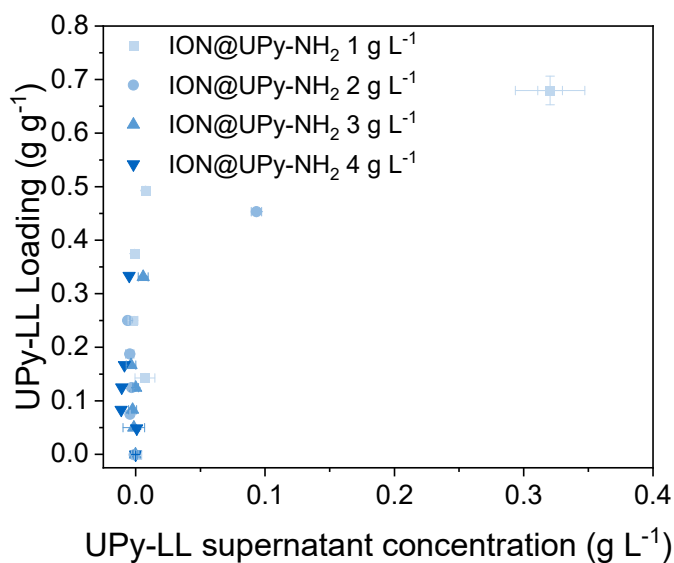

**Figure S2:** UPy-LL loading on different ION@UPy-NH<sub>2</sub> concentrations.

**Table S1:** Amount of bound UPy-LL on ION@UPy-NH<sub>2</sub> after dilution to different particle concentrations.

| ION@UPy-NH <sub>2</sub> @UPy-LL concentration [g L <sup>-1</sup> ] | 0 g L <sup>-1</sup> | 0.005 g L <sup>-1</sup> | 0.01 g L <sup>-1</sup> | 0.015 g L <sup>-1</sup> | 0.03 g L <sup>-1</sup> | 0.04 g L <sup>-1</sup> | 0.05 g L <sup>-1</sup> | 0.075 g L <sup>-1</sup> | 0.1 g L <sup>-1</sup> |
|--------------------------------------------------------------------|---------------------|-------------------------|------------------------|-------------------------|------------------------|------------------------|------------------------|-------------------------|-----------------------|
| UPy-LL concentration bound to ION@UPy-NH <sub>2</sub>              | 0 μM                | 1.77 μM                 | 3.53 μM                | 5.40 μM                 | 10.6 μM                | 14.1 μM                | 17.7 μM                | 26.5 μM                 | 35.3 μM               |

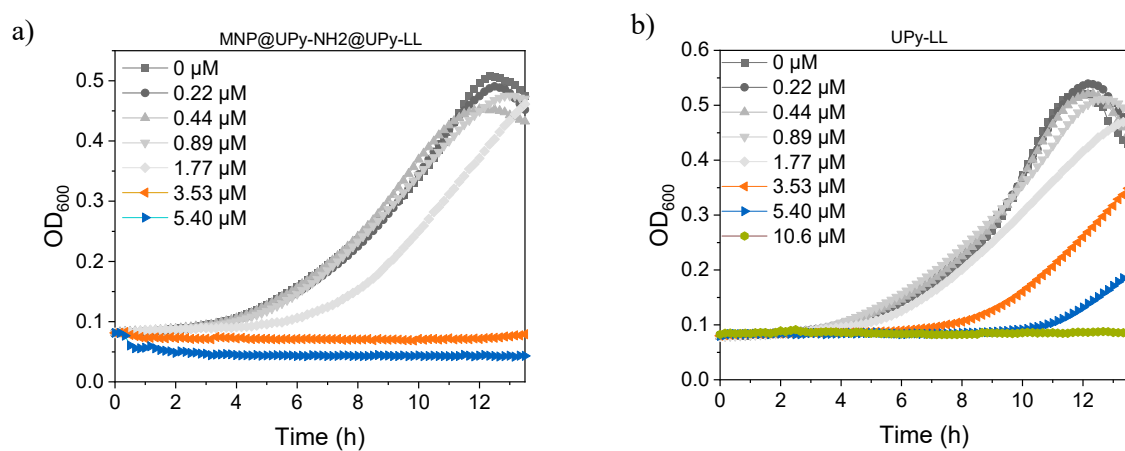

**Figure S3:** OD<sub>600</sub> measurements of *E. coli* growth contacted with (a) ION@UPy-NH<sub>2</sub>@UPy-LL and (b) free UPy-LL.
